# Supplementary material
Source: HighWire-hosted journal article supplement (https://bmjpaedsopen.bmj.com/content/3/1/e000333)
Supplement: inline-supplementary-material-1 [file inline-supplementary-material-1.docx]

Dear Dr. Anne Smits, Associate Editor, BMJ Paediatrics Open, Oct 26, 2018

We are very pleased to hear the recommended publication of our manuscript ID bmjpo-2018-000333.R1 entitled "Arterial Flow Patterns in Healthy Transitioning Near-Term Neonates. Please find our response to the minor revision below:

Concerning the question of providing definitions of PI and RI in the background section (p8 lines 12-19), this still reads a little bit strange for me. I would expect a single, clear definition for each parameter. I would suggest to remove the fact the parameter was used to assess astronouts, and rephrase your sentences so that 1 clear definition of PI (What is PI) and of RI (What is RI) is provided for the reader.

We have changed the paragraph and taken out the sentence with the astronauts and rather given a definition of PI and RI.

Thank you,

kind regards

Amelie Stritzke
